# Supplementary material
Source: publisher figshare collection journal article supplement (https://tandf.figshare.com/ndownloader/files/9362761)
Supplement: Supplementary file 1 [file 9362761]

**S2 Table** Variance value for coverage’s median distribution for each chip.

| **Chip** | **Variance** |
| --- | --- |
| 1 | 10938 |
| 2 | 17286 |
| 3 | 3043 |
| 4 | 3698 |
